# Supplementary material
Source: publisher figshare collection journal article supplement (https://tandf.figshare.com/ndownloader/files/14162846)
Supplement: Supplementary file 1 [file 14162846]

**Supplemental Tables**

*Table S1.* Moderation by values: Stepwise regression analysis of being moved on eliciting conditions, values and their interaction

| **Study 1** | *Model 1* | *Model 2* |  | *Model 3* | *Model 4* |
| --- | --- | --- | --- | --- | --- |
| *ΔR²* | .46*** | .04* | *ΔR²* | .39*** | .01 |
| Relationships | .68*** | .68*** | Relationships | .71*** | .71*** |
| Achievements | .31*** | .33*** | Achievements | .35*** | .35*** |
| Moral Identity | .28*** | .15 | Achievement Motivation | .08 | -.06 |
| Relationships X Moral Ident. |  | .25** | Relationships X Ach. Mot. |  | .15 |
| Achievements X Moral Ident. |  | -.01 | Achievements X Ach. Mot. |  | .09 |
| **Study 2** | *Model 1* | *Model 2* |  | *Model 3* | *Model 4* |
| *ΔR²* | .56*** | .02* | *ΔR²* | .55*** | .01 |
| Reunion | .72*** | .72*** | Reunion | .72*** | .72*** |
| Separation | .75*** | .75*** | Separation | .75*** | .75*** |
| Success | .81*** | .81*** | Success | .81*** | .81*** |
| Failure | .75*** | .75*** | Failure | .75*** | .75*** |
| Moral Identity | .13** | -.14 | Achievement Motivation | .07 | .13 |
| Reunion X Moral Ident. |  | .21** | Reunion X Ach. Mot. |  | -.10 |
| Separation X Moral Ident. |  | .13 | Separation X Ach. Mot. |  | -.02 |
| Success X Moral Ident. |  | .11 | Success X Ach. Mot. |  | -.03 |
| Failure X Moral Ident. |  | .16* | Failure X Ach. Mot. |  | .02 |
|  | *Model 5* | *Model 6* |  | *Model 7* | *Model 8* |
| *ΔR²* | .54*** | .03* | *ΔR²* | .54*** | .01 |
| Reunion | .72*** | .72*** | Reunion | .72*** | .72*** |
| Separation | .75*** | .76*** | Separation | .75*** | .74*** |
| Success | .81*** | .82*** | Success | .81*** | .82*** |
| Failure | .75*** | .75*** | Failure | .74*** | .75*** |
| Transcendence vs. Enhancement | .04 | -.16 | Conservation vs. Openness | .02 | -.03 |
| Reunion X Trans. vs. Enhance. |  | .23** | Reunion X Con. vs. Open. |  | .05 |
| Separation X Trans. vs. Enhance. |  | .07 | Separation X Con. vs. Open. |  | .08 |
| Success X Trans. vs. Enhance. |  | .08 | Success X Con. vs. Open. |  | .03 |
| Failure X Trans. vs. Enhance. |  | .04 | Failure X Con. vs. Open. |  | -.04 |
| **Study 3** | *Model 1* | *Model 2* |  | *Model 3* | *Model 4* |
| *ΔR²* | .22*** | .01 | *ΔR²* | .20*** | .01* |
| Social | .42*** | .42*** | Social | .42*** | .42*** |
| Environment | .04 | .04 | Environment | .04 | .04 |
| Sport | .28*** | .28*** | Sport | .28*** | .28*** |
| Transcendence vs. Enhancement | .13*** | .12** | Conservation vs. Openness | .03 | .04 |
| Social X Trans. vs. Enhance. |  | -.02 | Social X Con. vs. Open. |  | .01 |
| Env. X Trans. vs. Enhance. |  | .07* | Env. X Con. vs. Open. |  | -.06* |
| Sport X Trans. vs. Enhance. |  | -.02 | Sport X Con. vs. Open. |  | .04 |
|  | *Model 5* | *Model 6* |  | *Model 7* | *Model 8* |
| *ΔR²* | .20*** | <.01 | *ΔR²* | .20*** | .01* |
| Social | .42*** | .42*** | Social | .42*** | .42*** |
| Environment | .04 | .04 | Environment | .04 | .04 |
| Sport | .28*** | .28*** | Sport | .28*** | .28*** |
| NEP | .02 | .04 | GEB | .06* | .03 |
| Social X NEP |  | -.03 | Social X GEB |  | .01 |
| Env. X NEP |  | .01 | Env. X GEB |  | .09** |
| Sport X NEP |  | -.01 | Sport X GEB |  | -.01 |
|  | *Model 5* | *Model 6* |  | *Model 7* | *Model 8* |
| *ΔR²* | .21*** | <.01 | *ΔR²* | .20*** | <.01 |
| Social | .42*** | .42*** | Social | .42*** | .42*** |
| Environment | .04 | .04 | Environment | .04 | .04 |
| Sport | .28*** | .28*** | Sport | .28*** | .28*** |
| Sens. Injustice | .10*** | .14*** | BJW | .07* | .04 |
| Social X Sens. Injustice |  | -.01 | Social X BJW |  | .03 |
| Env. X Sens. Injustice |  | -.02 | Env. X BJW |  | .02 |
| Sport X Sens. Injustice |  | -.05 | Sport X BJW |  | .03 |

*Table S2.* Mediation by appraisals of surpassing and violating standards (Study 2)

| **Direct Effects** | **Dependent Variable** | | | | | | | | |
| --- | --- | --- | --- | --- | --- | --- | --- | --- | --- |
| Surpassing Social | | Violating Social | | Surpassing Ach. | | Violating  Ach. | | Being  Moved |
| Reunion | .57*** | | -.25** | | .13 | | -.45*** | | .48*** |
| Separation | .79*** | | -.59*** | | .29*** | | -.63*** | | .38*** |
| Success | .61*** | | -.42*** | | .67*** | | -.61*** | | .47*** |
| Failure | .65*** | | -.58*** | | .54*** | | -.53*** | | .39*** |
| Surpassing Social |  | |  | |  | |  | | .35*** |
| Violating Social |  | |  | |  | |  | | -.10 |
| Surpassing Ach. |  | |  | |  | |  | | .12* |
| Violating Ach. |  | |  | |  | |  | | -.01 |
| **Indirect Effects on Being Moved** | | **Mediator** | | | | | | | |
| Surpassing Social | | Violating  Social | | Surpassing  Ach. | | Violating  Ach. | |
| Reunion | | .20*** | | .03 | | .02 | | .01 | |
| Separation | | .28*** | | .06 | | .04 | | .01 | |
| Success | | .22*** | | .04 | | .08* | | .01 | |
| Failure | | .23*** | | .06 | | .07* | | .01 | |

*Note.* Standardized estimates are shown.**p* < .05, ***p* < .01, ****p* < .001, *N* = 228

*Table S3.* Mediation by appraisals of surpassing standards and GAQ-appraisals (Study 3)

| **Direct Effects** | **Dependent Variable** | | | | | | | | | |
| --- | --- | --- | --- | --- | --- | --- | --- | --- | --- | --- |
| Surpassing Social | | Surpassing Ach. | | Condusive-ness | | Obstructive-ness | | Norm Violation | Being  Moved |
| Social | .78*** | | .70*** | | .20*** | | -.30*** | | -.72*** | .22** |
| Environment | .35*** | | .50*** | | .52*** | | -.28*** | | -.70*** | -.16** |
| Sports | .19*** | | .65*** | | .13*** | | -.33*** | | -.69*** | .21*** |
| Surpassing Social |  | |  | |  | |  | |  | .16*** |
| Surpassing Ach. |  | |  | |  | |  | |  | .14** |
| Conduciveness |  | |  | |  | |  | |  | .28*** |
| Obstructiveness |  | |  | |  | |  | |  | .20*** |
| Norm Violation |  | |  | |  | |  | |  | .02 |
| **Indirect Effects on Being Moved** | | **Mediator** | | | | | | | | |
| Surpassing Social | | Surpassing Ach. | | Condusiveness | | Obstructiveness | | Norm Violation |
| Social | | .13*** | | .10** | | .06*** | | -.06*** | | -.02 |
| Environment | | .06** | | .07** | | .14*** | | -.06*** | | -.02 |
| Sports | | .03** | | .09** | | .04*** | | -.07*** | | -.02 |

*Note.* Standardized estimates are shown.**p* < .05, ***p* < .01, ****p* < .001, *N* = 190
